# Supplementary material
Source: Springer Nature journal article supplement (https://www.springermedizin.de/resource/supplementary/12888_2013_1679_MOESM1_ESM.pdf/9481186)

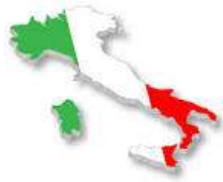

Step 1  
Cases identification and  
basic evaluation

Step 2  
optional level of the  
study

1) In depth –  
qualitative study

2) Case controls  
(with FEP  
natives)

3) 12 months  
Follow-up

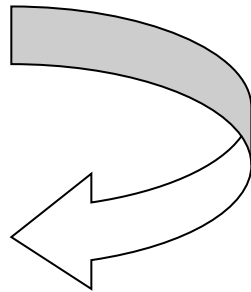

Supplement: MOESM1 [file 9481186]
